# Supplementary material for: Programming nanostructures of polymer brushes by dip-pen nanodisplacement lithography (DNL)
Source: Royal Society of Chemistry journal article supplement (doi:10.1039/c0nr00565g), 2010-01-01
Supplement: c0nr00565g.pdf [file c0nr00565g.pdf]

**Supporting Information**

**Programming Nanostructures of Polymer Brushes by Dip-Pen Nanodisplacement  
Lithography (DNL)**

*Xuqing Liu, Yi Li, Zijian Zheng\**

Nanotechnology Center, Institute of Textiles and Clothing, The Hong Kong Polytechnic  
University, Hung Hom, Kowloon, Hong Kong SAR

Email: tczzheng@inet.polyu.edu.hk

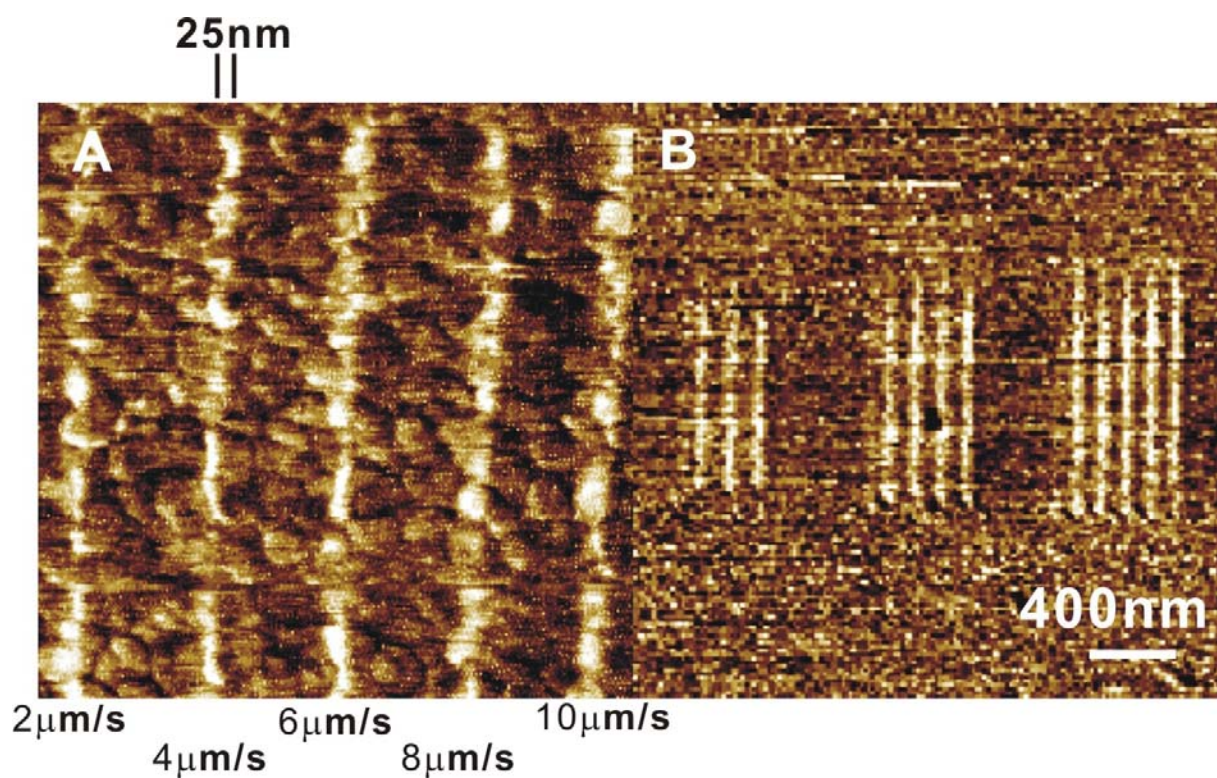

**FigureS1.** LFM images of patterned MUDBr lines by DNL.

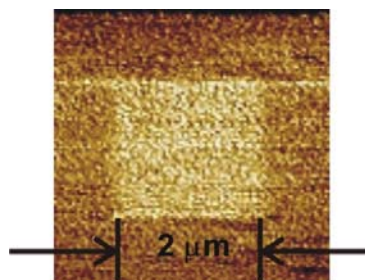

**Figure S2.** LFM image of  $2\ \mu\text{m} \times 2\ \mu\text{m}$  MUDBr square written by DNL at  $100\ \mu\text{m/s}$  and 20% relative humidity.

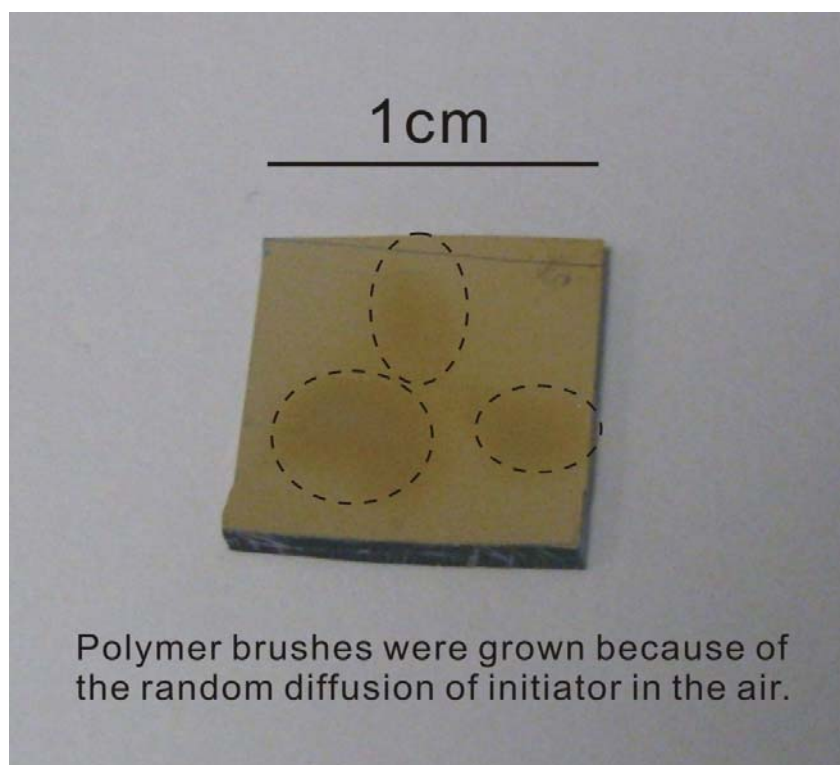

**Figure S3.** Digital image of polymer brushes grown on top of gold substrate (without any passivation layer). A DPN tip inked with MUDBr was held on top of the substrate for 1 hr. MUDBr was diffused in the air and self-assembled randomly onto the gold surface. The highlighted areas are those heavily covered with PMETAC brushes.

**Table 1** Comparison among DPN, Nanografting, and DNL

| <b>SPL method</b> | <b>Working Mechanism</b>                                                                          | <b>Operation Environment</b>                                  | <b>Major advantages</b>                                                                                                                                                                            | <b>Major drawbacks</b>                                                                                                                        |
|-------------------|---------------------------------------------------------------------------------------------------|---------------------------------------------------------------|----------------------------------------------------------------------------------------------------------------------------------------------------------------------------------------------------|-----------------------------------------------------------------------------------------------------------------------------------------------|
| DPN               | Ink molecules diffuse through water meniscus                                                      | In air with controlled humidity and temperature               | Constructive method, little crosstalk at multiplexing; parallel patterning method demonstrated; feature size controlled by diffusion                                                               | Difficult to control ink diffusion; not suitable for volatile inks; feature size limited to size of water meniscus and speed of ink diffusion |
| Nanografting      | AFM tips scratch SAM resist and ink molecules dissolved in the solution graft onto uncovered area | In solution                                                   | Higher resolution than DPN; suitable for a wide variety of inks; feature size controlled by scanned areas                                                                                          | Difficult to operate in solution; contamination and crosstalk can be a major problem at multiplexing; parallel patterning not demonstrated    |
| DNL               | AFM tips scratch SAM resist and ink molecules on the tip self-assemble onto uncovered area        | In air, no special control of humidity and temperature needed | Similar resolution to nanografting; suitable for a wide variety of inks; low crosstalk at multiplexing; grafting density controllable with applied force; feature size controlled by scanned areas | Parallel patterning not demonstrated                                                                                                          |
